# Supplementary material
Source: Springer Nature journal article supplement (https://www.springermedizin.de/resource/supplementary/12916_2010_364_MOESM2_ESM.pdf/9599792)

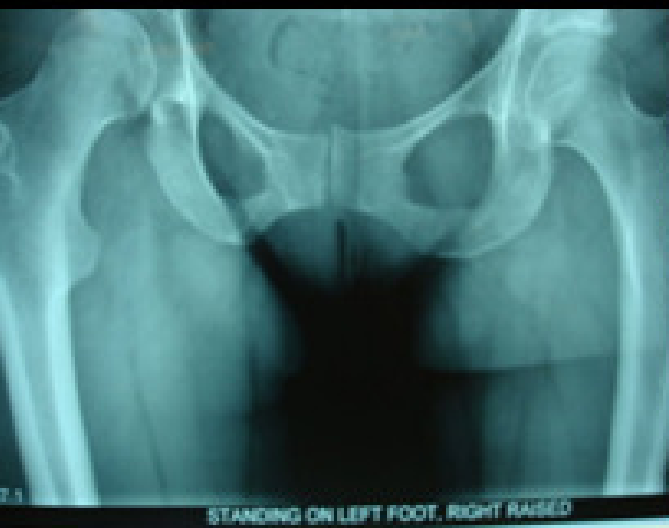

**A**

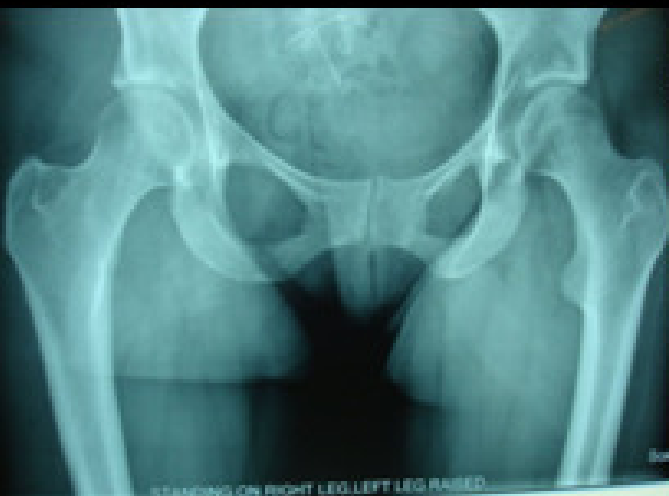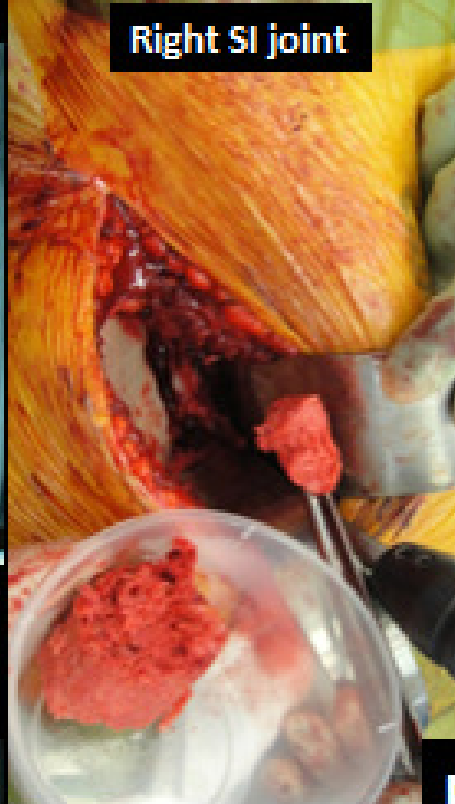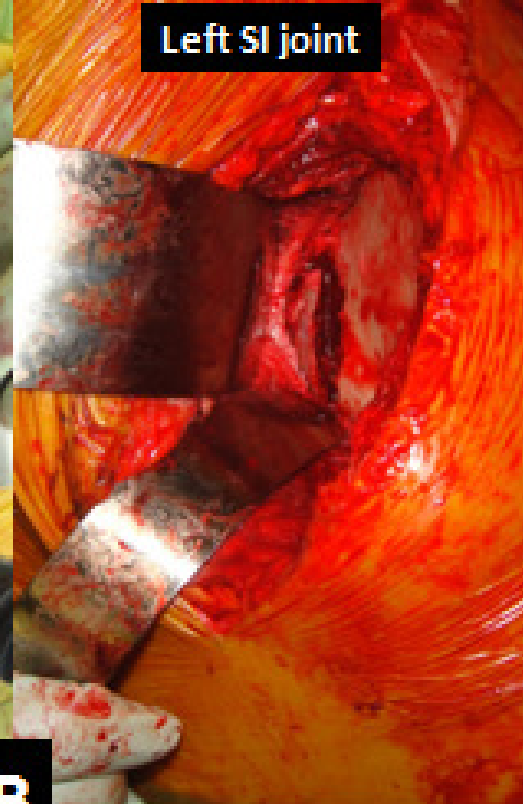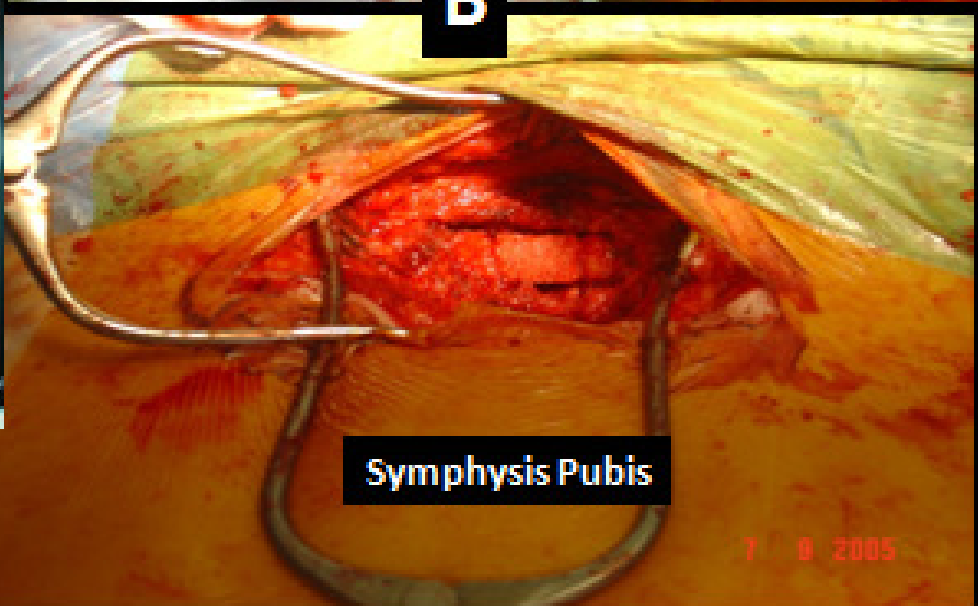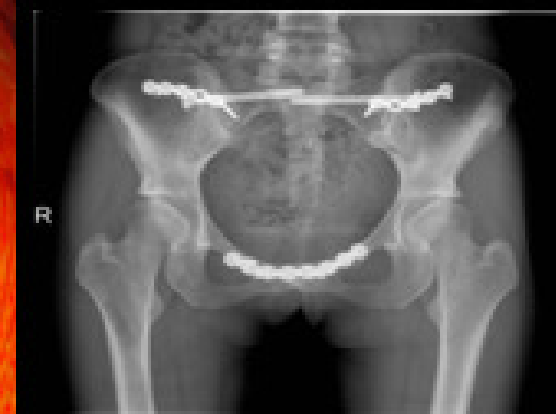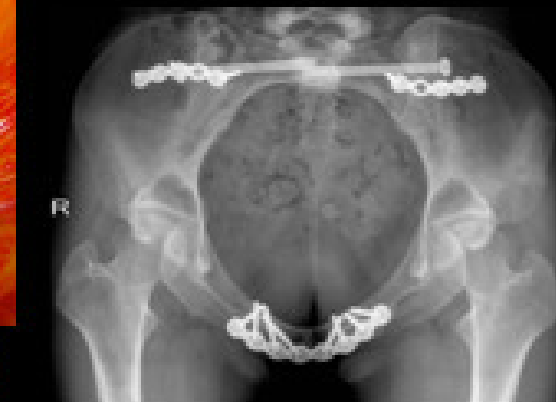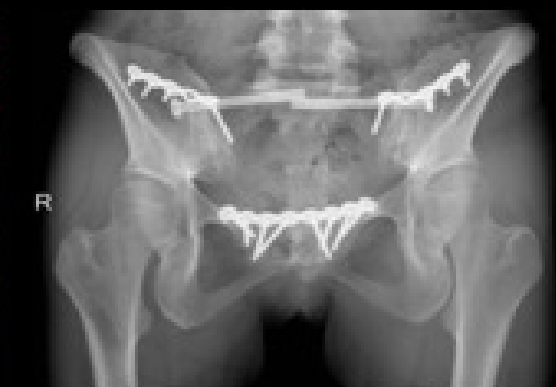

**C**

Supplement: MOESM2 [file 9599792]
